# Supplementary material for: Bronchoscopic Cryobiopsy and Forceps Biopsy for the Diagnostic Evaluation of Diffuse Parenchymal Lung Disease in Clinical Practice
Source: PubMed Central journal article supplement — Mayo Clin Proc Innov Qual Outcomes. 2020 Oct 6;4(5):565–74. doi: 10.1016/j.mayocpiqo.2020.05.005 (PMC7560571; doi:10.1016/j.mayocpiqo.2020.05.005), 2020-10-06
Supplement: mmc1.pdf [file mmc1.pdf]

**Supplemental Table 1. Histologic and Clinical Diagnosis per Bronchoscopic Procedure<sup>a</sup>**

| <b>Transbronchial Forceps Biopsy (TBFB)</b> |                               |                                                                                                                                                                                                    |
|---------------------------------------------|-------------------------------|----------------------------------------------------------------------------------------------------------------------------------------------------------------------------------------------------|
|                                             | <b>Histologic Diagnosis</b>   | <b>Final Diagnosis</b>                                                                                                                                                                             |
| 31.1%                                       | Granulomatous, non-infectious | 9 HP; 15 Sarcoidosis; 2 RA-related; 1 ANCA-associated                                                                                                                                              |
| 23.2%                                       | Indeterminate ILD             | 23 Indeterminate; 2 NSIP vs chronic HP; 3 suspected diffuse aspiration bronchiolitis; 1 PPFE; 1 probable COP; 1 suspected IPF; 1 suspected pneumonia; 1 suspected GLILD; 1 suspected CTD (Sjögren) |
| 17.9%                                       | Organizing pneumonia          | 6 drug-induced; 5 radiation/exposure-induced; 2 CTD-related; 14 cryptogenic                                                                                                                        |
| 4.6%                                        | Eosinophilic pneumonia        | 7 chronic eosinophilic pneumonia                                                                                                                                                                   |
| 4.0%                                        | Non-UIP fibrotic ILD          | 3 NSIP, myositis-related; 1 NSIP, scleroderma-related; 1 NSIP, RA-related                                                                                                                          |
| 3.3%                                        | UIP                           | 4 IPF; 1 UIP, RA-related;                                                                                                                                                                          |
| 3.3%                                        | Infection                     | 1 <i>Coccidioides</i> pneumonia; 3 pulmonary histoplasmosis; 1 PJP, AIDS-related                                                                                                                   |
| 2.6%                                        | RB-ILD/DIP                    | 4 RB-ILD                                                                                                                                                                                           |
| 2.0%                                        | Neoplasm                      | 1 Adenocarcinoma; 2 Lymphoma                                                                                                                                                                       |
| 1.3%                                        | pLCH                          | 2 pLCH                                                                                                                                                                                             |
| 1.3%                                        | Aspiration                    | 2 Aspiration bronchiolitis                                                                                                                                                                         |
| 0.7%                                        | Bronchiolitis                 | 1 IBD-related bronchiolitis                                                                                                                                                                        |
| 0.7%                                        | PAP                           | 1 PAP                                                                                                                                                                                              |
| 0.7%                                        | Amyloid                       | 1 Amyloid, ATTR                                                                                                                                                                                    |
| 0.7%                                        | LIP                           | 1 Sjogren-related                                                                                                                                                                                  |
| 0.7%                                        | CHF                           | 1 CHF                                                                                                                                                                                              |

| <b>Transbronchial Lung Cryobiopsy (TBCB)</b> |                               |                                                                                                                                                     |
|----------------------------------------------|-------------------------------|-----------------------------------------------------------------------------------------------------------------------------------------------------|
|                                              | <b>Histologic Diagnosis</b>   | <b>Final Diagnosis</b>                                                                                                                              |
| 25.8%                                        | Indeterminate ILD             | 14 indeterminate; 2 suspected HP; 1 suspected DIPNECH; 1 IPF vs chronic HP; 1 NSIP vs UIP/IPF; 1 probable aspiration; 1 suspected pulmonary amyloid |
| 24.2%                                        | Granulomatous, non-infectious | 3 HP; 1 sarcoidosis; 3 GL-ILD                                                                                                                       |
| 12.5%                                        | Organizing pneumonia          | 3 drug-induced; 1 radiation-induced; 6 cryptogenic; 4 CTD-related                                                                                   |
| 7.5%                                         | UIP                           | 4 IPF; 1 CPFE                                                                                                                                       |
| 5.8%                                         | Infection                     | 2 PCP, non-AIDS; 1 blastomycosis; 1 <i>M. abscessus</i> ; 1 Bronchiectasis with mixed flora 2; 1 AFOP with sepsis                                   |
| 5.0%                                         | Neoplasm                      | 2 adenocarcinoma; 3 lymphoma; 1 lymphomatoid granulomatosis                                                                                         |
| 3.3%                                         | Bronchiolitis                 | 3 cryptogenic constrictive bronchiolitis; 1 bronchiectasis with chronic bronchiolitis                                                               |
| 3.3%                                         | Aspiration                    | 3 Aspiration pneumonia                                                                                                                              |
| 2.5%                                         | Non-UIP fibrotic ILD          | 2 NSIP, UCTD-related; 1 NSIP, RA-related                                                                                                            |
| 2.5%                                         | RB-ILD/DIP                    | 1 RB-ILD; 2 DIP                                                                                                                                     |
| 0.8%                                         | Eosinophilic pneumonia        | 1 chronic eosinophilic pneumonia                                                                                                                    |
| 0.8%                                         | PAP                           | 1 sirolimus-induced PAP                                                                                                                             |
| 0.8%                                         | Amyloid                       | 1 pulmonary amyloidosis                                                                                                                             |

**<sup>a</sup> Abbreviations:**

AFOP- acute fibrinous organizing pneumonia; AIDS- Acquired immune deficiency syndrome; ANCA- Antineutrophil cytoplasmic antibodies; ATTR- Amyloid Transthyretin amyloidosis; COP- cryptogenic organizing pneumonia; COPD- Chronic obstructive pulmonary disease; CPFE- Combine pulmonary fibrosis and emphysema; CTD- Connective tissue disease; DIP- Desquamative interstitial pneumonia; DIPNECH- Diffuse idiopathic pulmonary neuroendocrine cell hyperplasia; DLCO- Diffusing capacity for carbon monoxide; FEV<sub>1</sub>- Forced expiratory volume in 1 second; FVC- Forced vital capacity; GLILD- Granulomatous-lymphocytic interstitial lung disease; HP- hypersensitivity pneumonitis; IBD- Inflammatory bowel disease; IPF- idiopathic pulmonary fibrosis; LIP- Lymphoid interstitial pneumonia; NSIP- nonspecific interstitial pneumonia; OSA- Obstructive sleep apnea; PAP- Pulmonary alveolar proteinosis; pLCH- pulmonary Langerhans cell histiocytosis; PPFE- Pleuroparenchymal fibroelastosis; RA- rheumatoid arthritis; RB-ILD- respiratory bronchiolitis-interstitial lung disease; UCTD- Undifferentiated connective tissue disease; UIP- usual interstitial pneumonia.
